# Supplementary material
Source: Springer Nature journal article supplement (https://www.springermedizin.de/resource/supplementary/13014_2013_1224_MOESM8_ESM.pdf/9635184)

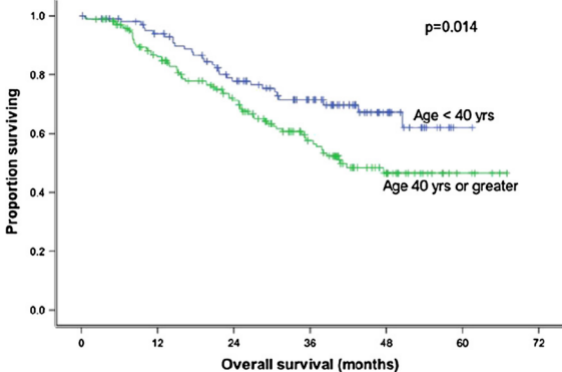

|                |     |     |    |    |    |   |   |
|----------------|-----|-----|----|----|----|---|---|
| <40 yrs        | 105 | 91  | 69 | 46 | 19 | 1 | 0 |
| 40 yrs or more | 168 | 131 | 94 | 55 | 24 | 5 | 0 |

Supplement: MOESM8 [file 9635184]
